# Supplementary material for: Masterful ecofriendly maintainable spectrophotometric techniques for considering indacaterol acetate and mometasone furoate: full evaluation and comparison of their greenness, whiteness, and blueness profiles
Source: Royal Society of Chemistry journal article supplement (doi:10.1039/d5ay00159e), 2025-01-01
Supplement: d5ay00159e2.pdf [file d5ay00159e2.pdf]

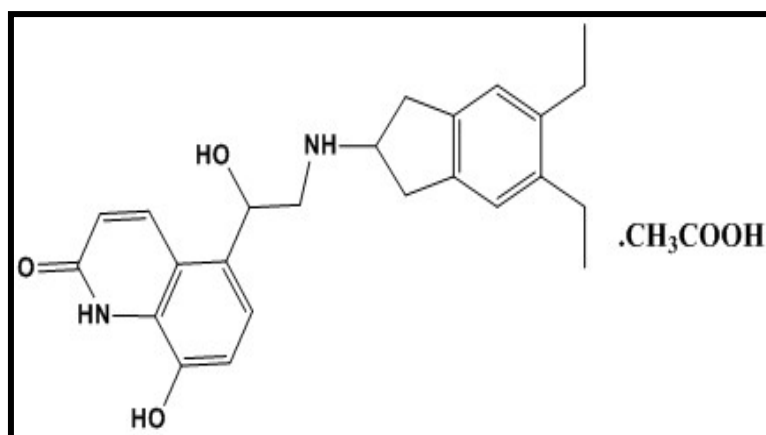

**Figure S1:** Chemical structure of Indacaterol acetate.

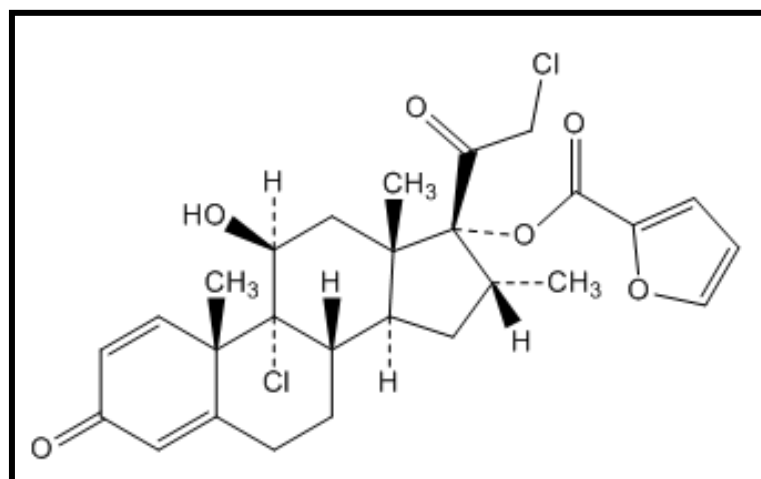

**Figure S2:** Chemical structure of Mometasone furoate.

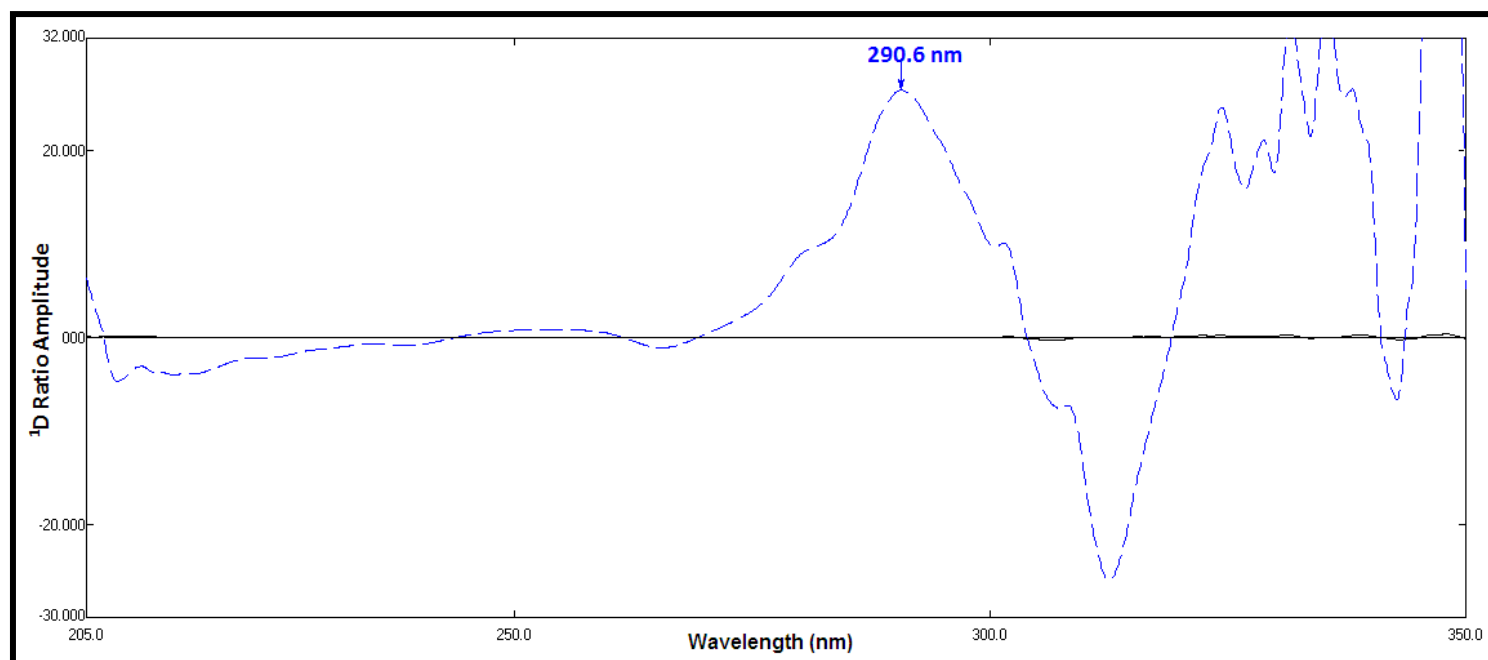

**Figure S3:** First derivative of ratio spectra of  $20.00 \mu\text{g mL}^{-1}$  each of Indacaterol acetate (-----), and Mometasone furaote ( — ) after using  $16.00 \mu\text{g mL}^{-1}$  of Mometasone furaote as a divisor to apply derivative ratio method (DRM) to determine Indacaterol acetate through using methanol as diluent.

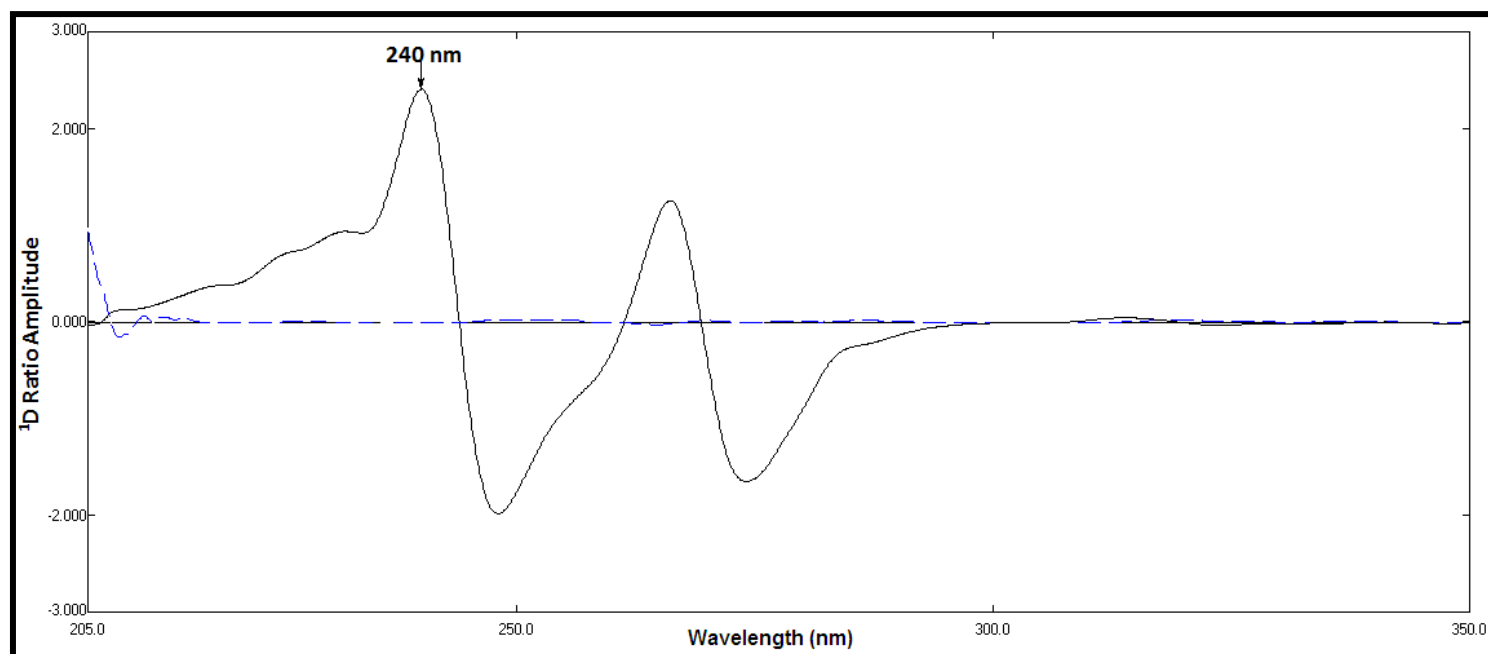

**Figure S4:** First derivative of ratio spectra of  $20.00 \mu\text{g mL}^{-1}$  each of Indacaterol acetate (-----), and Mometasone furaote ( — ) after using  $13.00 \mu\text{g mL}^{-1}$  of Indacaterol acetate as a divisor to apply derivative ratio method (DRM) to determine Mometasone furaote through using methanol as diluent.
